# Supplementary material for: Molnupiravir Use Among Patients with COVID-19 in Real-World Settings: A Systematic Literature Review
Source: PubMed Central journal article supplement — Infect Dis Ther. 2024 May 14;13(6):1177–98. doi: 10.1007/s40121-024-00976-5 (PMC11128428; doi:10.1007/s40121-024-00976-5), 2024-05-14
Supplement: 40121_2024_976_MOESM1_ESM.pdf [file 40121_2024_976_MOESM1_ESM.pdf]

# Molnupiravir Use Among Patients With COVID-19 in Real-World Settings: A Systematic Literature Review

Julia Richmond DiBello<sup>1</sup>, Valerie T. Raziano (0000-0003-4710-8070)<sup>2</sup>, Xinyue Liu (0000-0003-1610-1263)<sup>1</sup>, Amy Puenpatom<sup>2</sup>, Kathryn Peebles (0000-0002-2095-7446)<sup>1</sup>, Nazleen F. Khan (0000-0003-4012-6671)<sup>1</sup>, and Deanna D. Hill<sup>1</sup>

<sup>1</sup> Biostatistics and Research Decision Sciences (BARDS), Epidemiology, Merck & Co., Inc., Rahway, NJ, USA; <sup>2</sup> Center for Observational and Real-World Evidence (CORE), Merck & Co., Inc., Rahway, NJ, USA

*Corresponding author:*

Valerie Raziano  
351 N Sumneytown Pike  
North Wales, PA 19454  
Merck & Co., Inc., USA  
267-305-4794  
Email: Valerie.raziano@merck.com

## SUPPLEMENTARY MATERIAL

**Table S1. Search terms used to identify potentially eligible studies from the Embase database**

| Study variable | Search terms                                                                                                                                                                                                                                                                                                                                                                                                                                                                                                                                                                                                                                                                                                                                                                                                                                                                                                                                                                                                                                                                                                                                                                                                                                                                                  |
|----------------|-----------------------------------------------------------------------------------------------------------------------------------------------------------------------------------------------------------------------------------------------------------------------------------------------------------------------------------------------------------------------------------------------------------------------------------------------------------------------------------------------------------------------------------------------------------------------------------------------------------------------------------------------------------------------------------------------------------------------------------------------------------------------------------------------------------------------------------------------------------------------------------------------------------------------------------------------------------------------------------------------------------------------------------------------------------------------------------------------------------------------------------------------------------------------------------------------------------------------------------------------------------------------------------------------|
| Intervention   | 'molnupiravir'/exp OR '4 oxime 5` (2 methylpropanoate) uridine' OR '4 oxime 5` isobutyrate) uridine' OR '[3, 4 dihydroxy 5 [4 (hydroxyimino) 2 oxo 1 pyrimidinyl] 2 oxolanyl] methyl 2 methylpropanoate' OR '[3, 4 dihydroxy 5 [4 (hydroxyimino) 2 oxo 1 pyrimidinyl] 2 oxolanyl] methyl isobutyrate' OR '[3, 4 dihydroxy 5 [4 (hydroxyimino) 2 oxo 1 pyrimidinyl] 2 tetrahydrofuranyl] methyl isobutyrate' OR '[3, 4 dihydroxy 5 [4 (hydroxyimino) 2 oxopyrimidin 1 (2h) yl] tetrahydrofuran 2 yl] methyl isobutyrate' OR '[3, 4 dihydroxy 5 [4 (hydroxyimino) 2 oxopyrimidin 1 yl] oxolan 2 yl] methyl 2 methylpropanoate' OR '[3, 4 dihydroxy 5 [4 (hydroxyimino) 2 oxopyrimidin 1 yl] oxolan 2 yl] methyl isobutyrate' OR '[3, 4 dihydroxy 5 [4 (hydroxyimino) 2 oxopyrimidin 1 yl] tetrahydrofuran 2 yl] methyl isobutyrate' OR 'beta dextro n4 hydroxycytidine 5` isopropyl ester' OR 'eidd 2801' OR 'eidd2801' OR 'lagevrio' OR 'mk 4482' OR 'mk4482' OR 'molnupiravir' OR 'n4 hydroxycytidine 5` (2 methylpropanoate)' OR 'n4 hydroxycytidine 5` isobutyrate' OR 'n4 hydroxycytidinen 5` (2 propyl) ester' OR 'n4 hydroxycytidinen 5` isopropyl ester' OR 'uridine 5` (2 methylpropanoate) 4 oxime' OR 'uridine 5` methylpropanoate 4 oxime') OR ('molnupiravir'/exp OR molnupiravir) |
| Study type     | 'real world' OR 'cohort analysis'/de OR 'comparative effectiveness'/de OR comparative study'/de OR 'controlled study'/de OR 'logistic regression analysis'/de OR 'longitudinal study'/de OR 'meta analysis'/de OR 'meta analysis topic'/de OR 'multicenter study'/de OR 'multicenter study topic'/de OR 'multivariate logistic regression analysis'/de OR 'observational study'/de OR 'postmarketing surveillance'/de OR 'prospective study'/de OR 'retrospective study'/de OR 'secondary analysis'/de                                                                                                                                                                                                                                                                                                                                                                                                                                                                                                                                                                                                                                                                                                                                                                                        |
| Limit terms    | Human; time period 2021–2023                                                                                                                                                                                                                                                                                                                                                                                                                                                                                                                                                                                                                                                                                                                                                                                                                                                                                                                                                                                                                                                                                                                                                                                                                                                                  |

The Embase search was conducted as (all intervention search terms) AND (all study type search terms)

AND (all limit terms). The Scopus database search was conducted with the following search terms: (TITLE-ABS-KEY (molnupiravir OR lagevrio)) AND (real AND world) AND (LIMIT-TO (PUBYEAR, 2023) OR LIMIT-TO (PUBYEAR, 2022) OR LIMIT-TO (PUBYEAR, 2021)) AND (LIMIT-TO (SUBJAREA, "MEDI") OR LIMIT-TO (SUBJAREA, "PHAR") OR LIMIT-TO (SUBJAREA, "IMMU") OR LIMIT-TO (SUBJAREA, "NEUR")).
